# Supplementary material
Source: Springer Nature journal article supplement (https://www.springermedizin.de/resource/supplementary/12889_2010_2378_MOESM4_ESM.pdf/9485594)

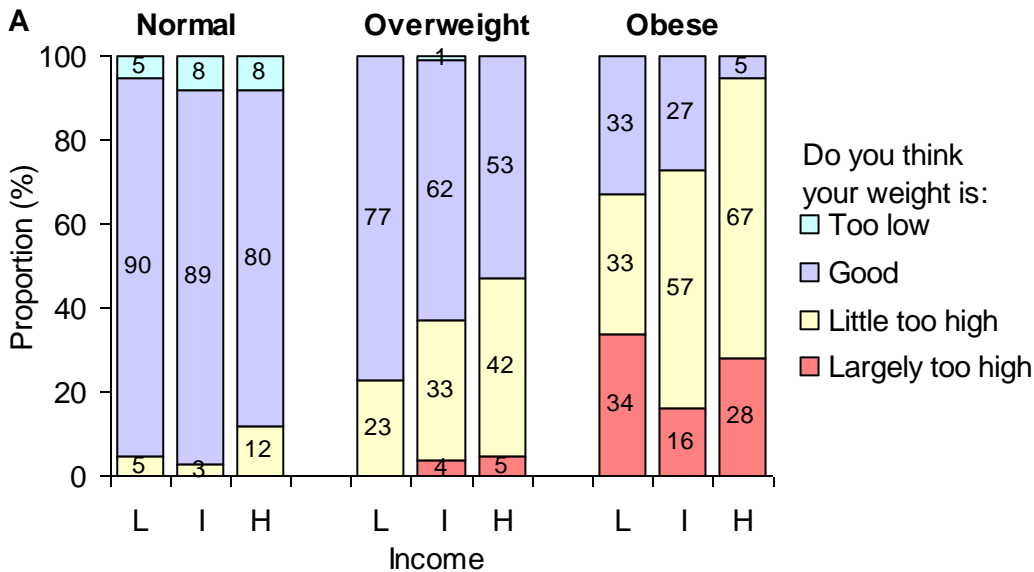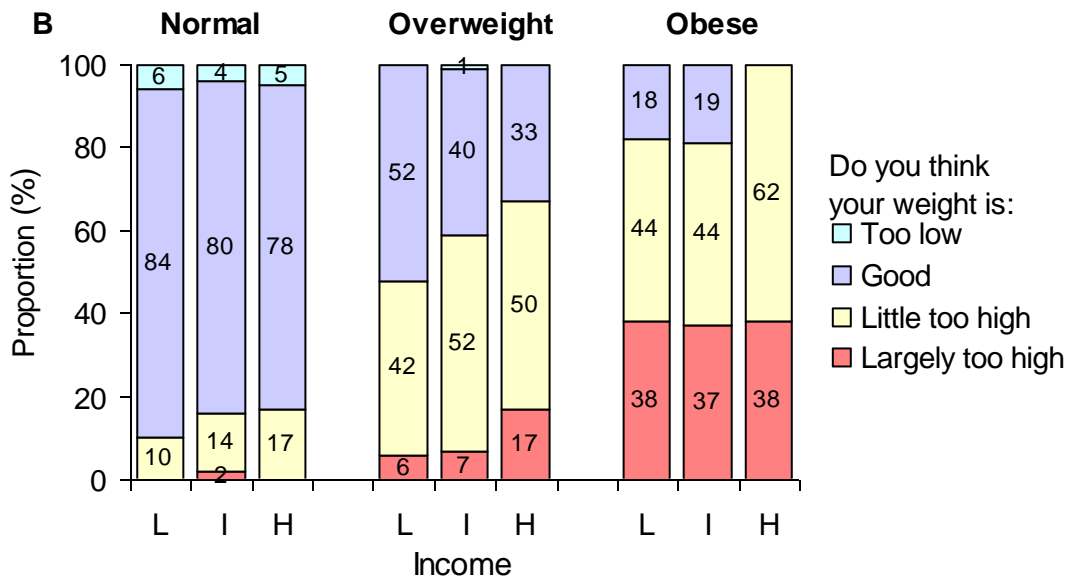

Supplement: MOESM4 [file 9485594]
